# Supplementary material for: Genomic Landscape of Normal and Breast Cancer Tissues in a Hungarian Pilot Cohort
Source: MDPI journal article supplement (doi:10.3390/ijms24108553), 2023-05-10

**Supplementary Figure 6. Comparison of mutation detection pipelines.**  
 Overlaps of mutations identified from WGS data and mutations detected by the Illumina TruSight Oncology (TSO) 500 assay default pipeline in case of **A.** all germline mutations detected by the TSO panel, **B.** all somatic mutations detected by the TSO panel, **C.** germline exon mutations detected by WGS and **D.** somatic exon mutations detected by WGS.

**A**

**all germline mutations  
detected by TSO panel**

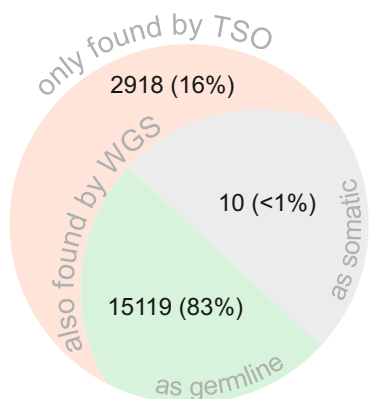

**B**

**all somatic mutations  
detected by TSO panel**

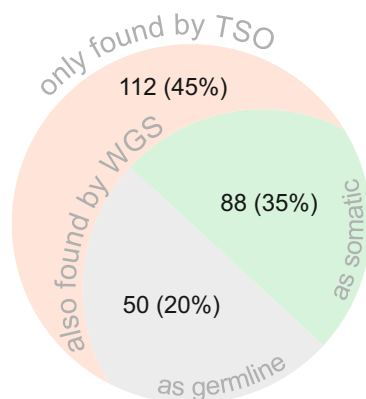

**C**

**germline exon mutations  
detected by WGS**

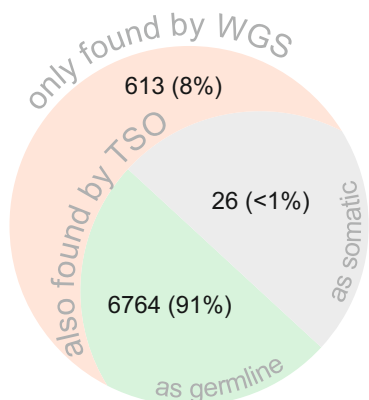

**D**

**somatic exon mutations  
detected by WGS**

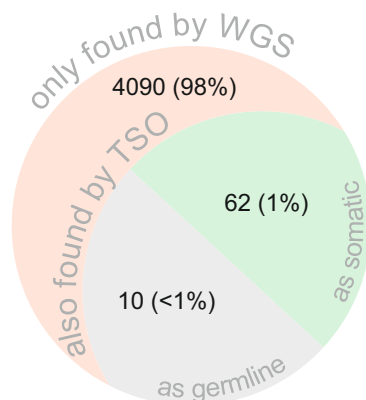

Supplement: s1 [file s1]
