# Supplementary material for: Genomic Landscape of Normal and Breast Cancer Tissues in a Hungarian Pilot Cohort
Source: MDPI journal article supplement (doi:10.3390/ijms24108553), 2023-05-10
Supplement: s1 [file s1]

**Supplementary Table 1.** URLs of the accessed websites and tools

| <b>Tool/resource</b>                                          | <b>URL</b>                                                                                                                                                                                                                                                                                | <b>Accessed</b>                    |
|---------------------------------------------------------------|-------------------------------------------------------------------------------------------------------------------------------------------------------------------------------------------------------------------------------------------------------------------------------------------|------------------------------------|
| FastQC<br>(v0.11.8)                                           | <a href="https://www.bioinformatics.babraham.ac.uk/projects/fastqc">https://www.bioinformatics.babraham.ac.uk/projects/fastqc</a>                                                                                                                                                         | 26 <sup>th</sup> September<br>2022 |
| multiQC<br>(v1.7)                                             | <a href="https://multiqc.info">https://multiqc.info</a>                                                                                                                                                                                                                                   | 26 <sup>th</sup> September<br>2022 |
| Picard tools<br>(v2.20.0)                                     | <a href="https://broadinstitute.github.io/picard/">https://broadinstitute.github.io/picard/</a>                                                                                                                                                                                           | 26 <sup>th</sup> September<br>2022 |
| SAMtools<br>(v1.5)                                            | <a href="http://samtools.sourceforge.net/">http://samtools.sourceforge.net/</a>                                                                                                                                                                                                           | 26 <sup>th</sup> September<br>2022 |
| bwa<br>(v0.7.12-r1039)                                        | <a href="http://bio-bwa.sourceforge.net">http://bio-bwa.sourceforge.net</a>                                                                                                                                                                                                               | 26 <sup>th</sup> September<br>2022 |
| GATK<br>(Genome Analysis Toolkit;<br>v4.0.10.1)               | <a href="https://software.broadinstitute.org/gatk">https://software.broadinstitute.org/gatk</a>                                                                                                                                                                                           | 26 <sup>th</sup> September<br>2022 |
| BQSR pipeline<br>(Base Quality Score<br>Recalibration)        | <a href="https://software.broadinstitute.org/gatk/documentation/tooldocs/3.8-0/org_broadinstitute_gatk_tools_walkers_bqsr_BaseRecalibrator.php">https://software.broadinstitute.org/gatk/documentation/tooldocs/3.8-0/org_broadinstitute_gatk_tools_walkers_bqsr_BaseRecalibrator.php</a> | 26 <sup>th</sup> September<br>2022 |
| VEP<br>(Ensembl Variant Effect<br>Predictor; v94)             | <a href="https://www.ensembl.org/vep">https://www.ensembl.org/vep</a>                                                                                                                                                                                                                     | 26 <sup>th</sup> September<br>2022 |
| COSMIC<br>(Catalogue of Somatic<br>Mutations in Cancer; v3.3) | <a href="https://cancer.sanger.ac.uk/cosmic/signatures">https://cancer.sanger.ac.uk/cosmic/signatures</a>                                                                                                                                                                                 | 26 <sup>th</sup> September<br>2022 |
