# Supplementary material for: Genomic Landscape of Normal and Breast Cancer Tissues in a Hungarian Pilot Cohort
Source: MDPI journal article supplement (doi:10.3390/ijms24108553), 2023-05-10

**Supplementary Figure 3. Distribution of mutational subtypes found in the analyzed samples.**  
 Whenever multiple tumor samples were available from the same patient, appropriate sample names are shown in blue.  
**A.** Ratio of mutational subtypes in case of mutations considered for TMB calculation. **B.** Ratio of mutational subtypes for all somatic mutations.

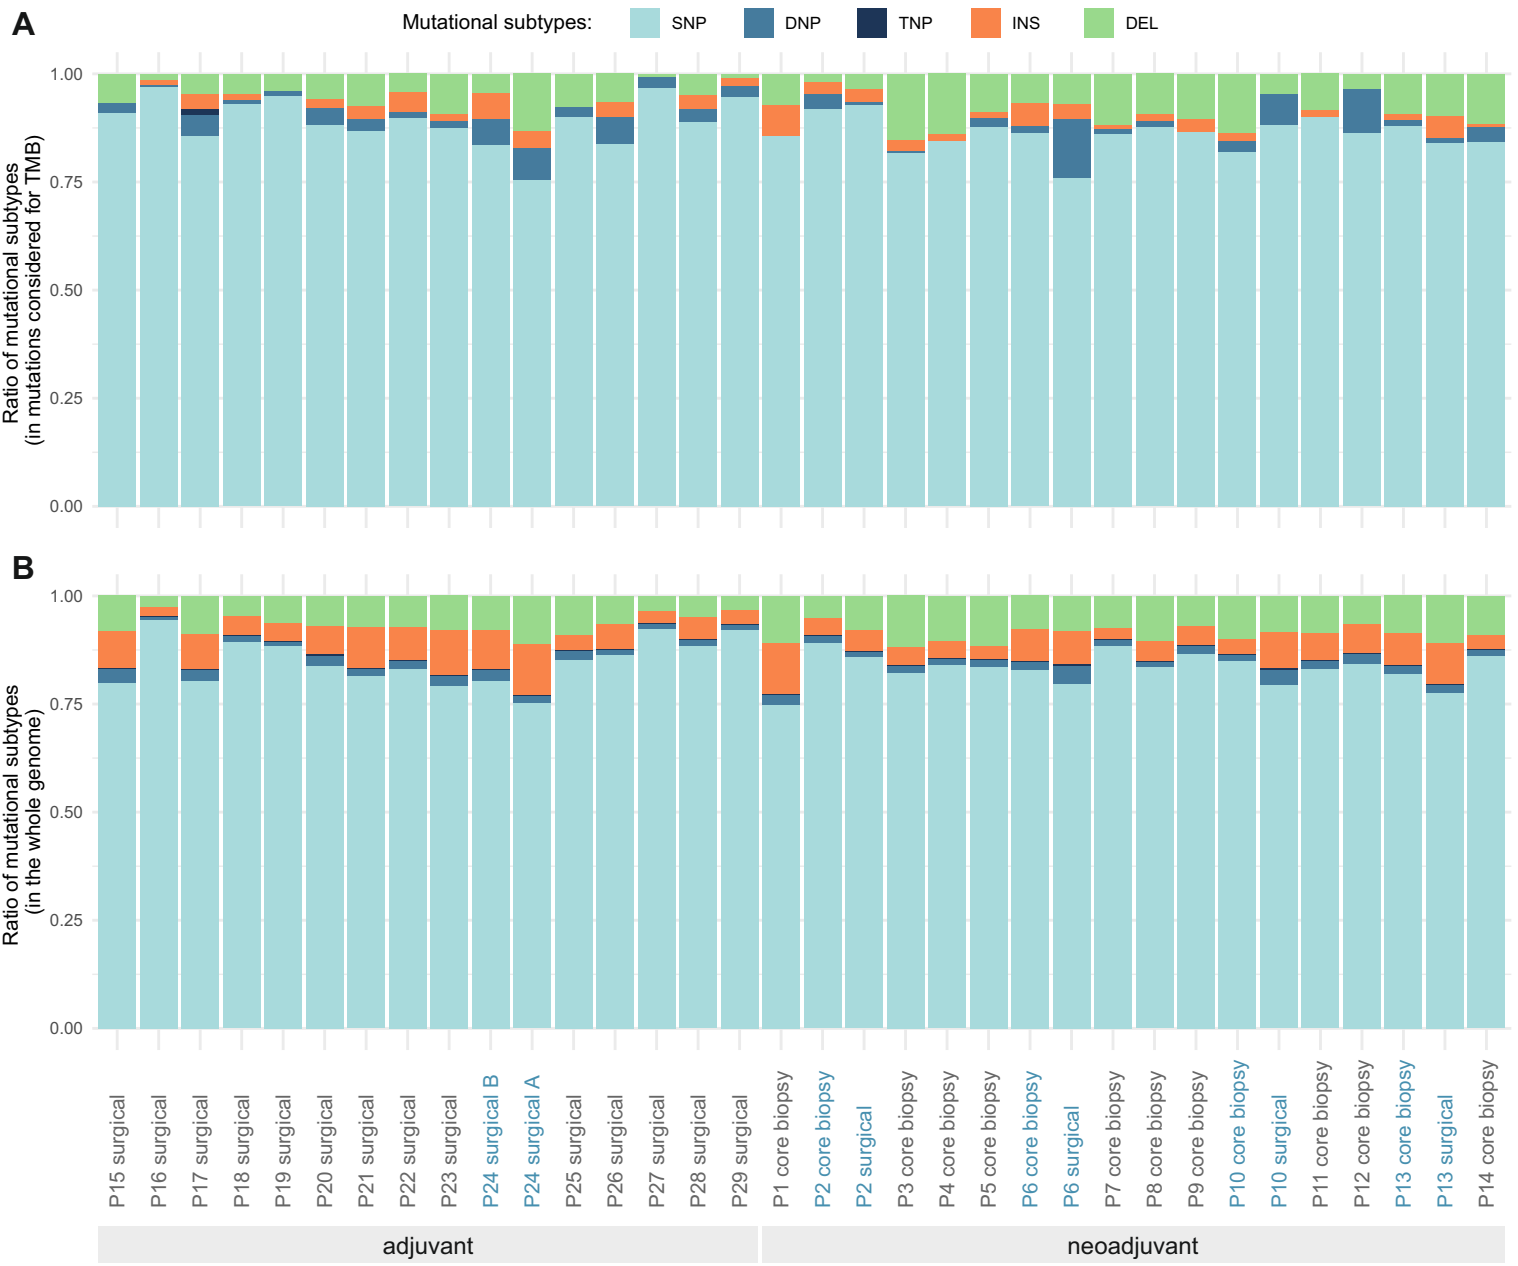

Supplement: s1 [file s1]
