# Supplementary material for: Genomic Landscape of Normal and Breast Cancer Tissues in a Hungarian Pilot Cohort
Source: MDPI journal article supplement (doi:10.3390/ijms24108553), 2023-05-10

# Supplementary Figure 5. Association between genetic markers of HRD.

Single points on the graphs represent the investigated tumor samples. **A.** Relationship between Single Base Substitution (SBS) Signature 3 contribution and HRD-score. **B.** Relationship between Indel (ID) Signature 6 and 8 total contribution and HRD-score. **C.** Relationship between SBS3 signature and total ID6 and ID8 signature contribution.

**A**

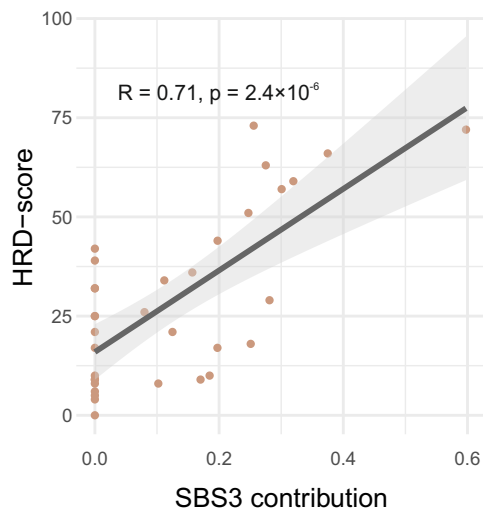

**B**

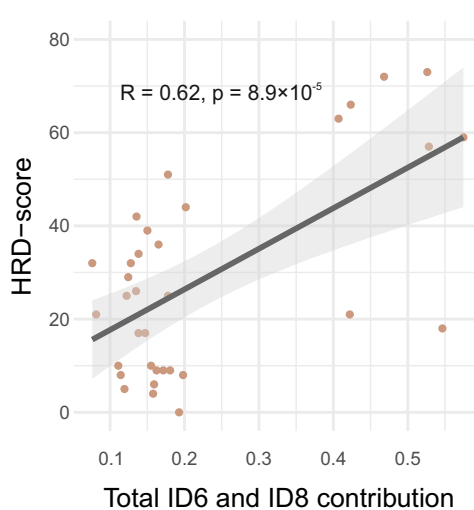

**C**

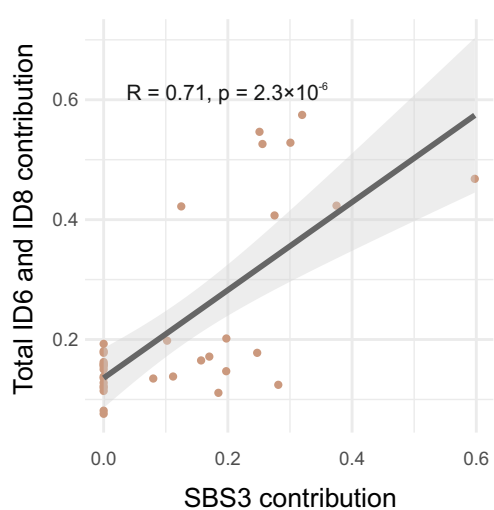

Supplement: s1 [file s1]
