# Supplementary material for: Genomic Landscape of Normal and Breast Cancer Tissues in a Hungarian Pilot Cohort
Source: MDPI journal article supplement (doi:10.3390/ijms24108553), 2023-05-10

**Supplementary Figure 2. Tumor mutational burden (TMB) and somatic mutational prevalence in investigated samples.**  
 Whenever multiple tumor samples were available from the same patient, appropriate bars and sample names are shown in blue. **A.** Tumor mutational burden (TMB) determined from WGS data in the analyzed samples. **B.** Somatic mutational prevalence determined from WGS data in the analyzed samples. **C.** Relationship between TMB calculated from WGS and data and from the Illumina TruSight Oncology 500 assay (TSO). **D.** Relationship between somatic mutational prevalence calculated from WGS and TMB calculated from TSO data.

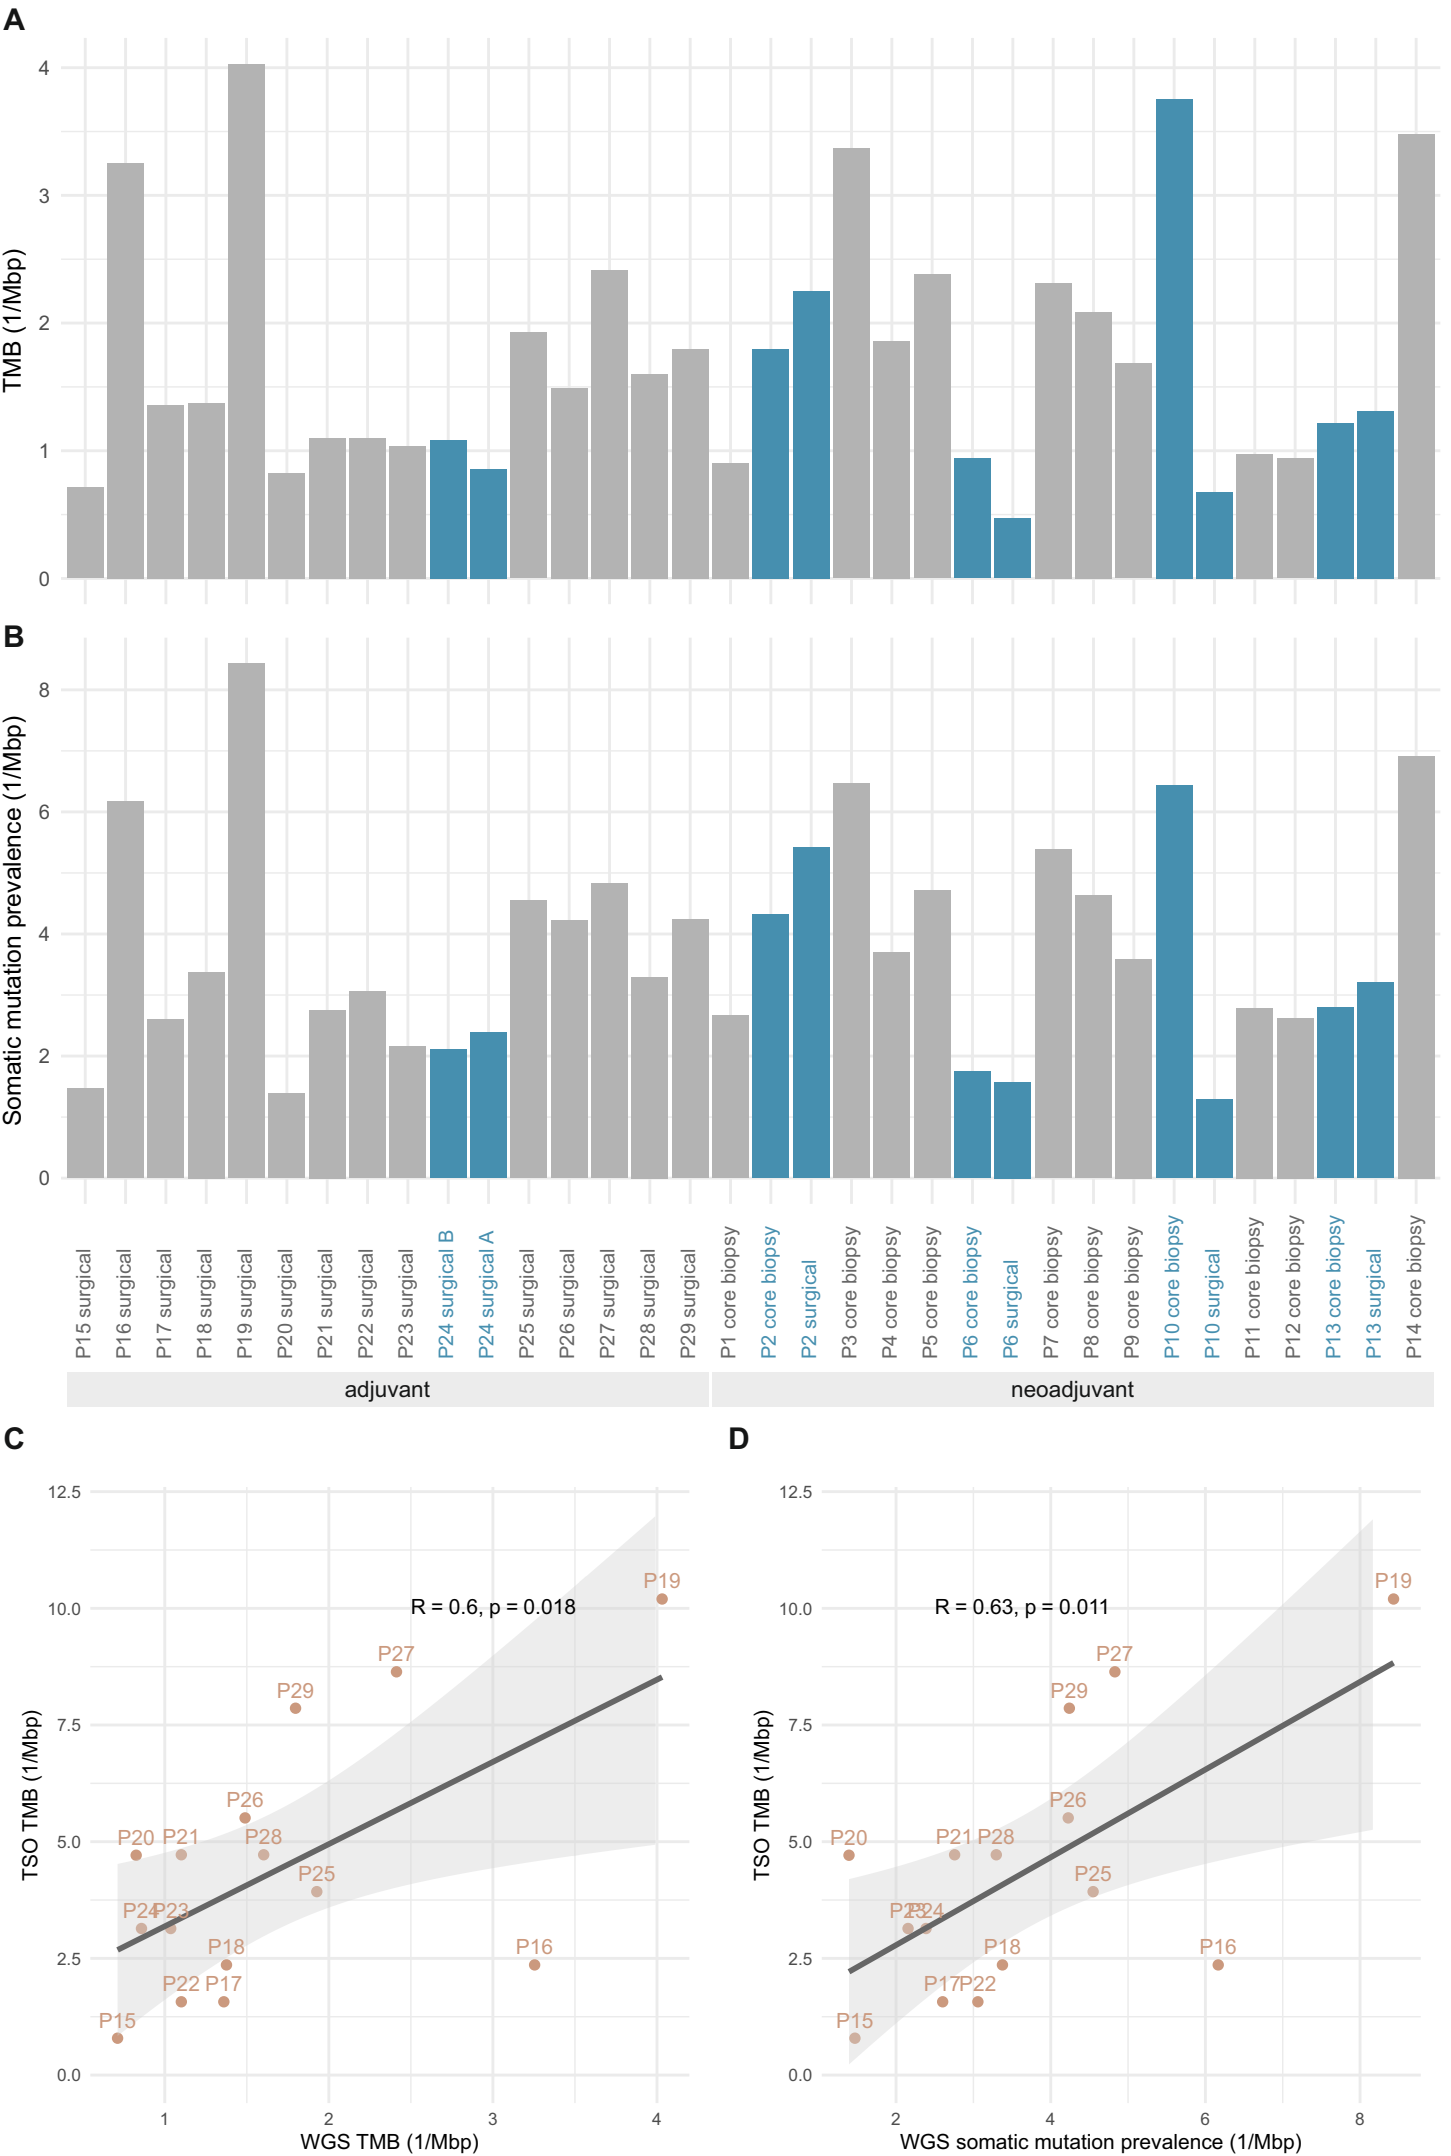

Supplement: s1 [file s1]
