# Supplementary material for: Genomic Landscape of Normal and Breast Cancer Tissues in a Hungarian Pilot Cohort
Source: Int J Mol Sci. 2023 May 10;24(10):8553. doi: 10.3390/ijms24108553 (PMC10218458; doi:10.3390/ijms24108553)
Supplement: Supplementary file 1 [file ijms-24-08553-s001.zip]

Archive with 8 entries (8 files):
- SupplementaryTable1.pdf
- SupplementaryTable2_new.xls
- Supp_Fig_1_new.pdf
- Supp_Fig_2_new.pdf
- Supp_Fig_3_new.pdf
- Supp_Fig_4_new.pdf
- Supp_Fig_5_new.pdf
- Supp_Fig_6_new.pdf
