# Supplementary material for: Genomic Landscape of Normal and Breast Cancer Tissues in a Hungarian Pilot Cohort
Source: Int J Mol Sci. 2023 May 10;24(10):8553. doi: 10.3390/ijms24108553 (PMC10218458; doi:10.3390/ijms24108553)
Supplement: Supplementary file 1 [file ijms-24-08553-s001.zip › SupplementaryTable2_new.xls]

## Sheet: all_gene_lists
Supplementary Table 2. The list of genes used in various analyses throughout the study. 1) TSO list: the list of genes targeted by the Illumina TruSight Oncology 500 assay; 2) NCCN guidelines list: genes listed in the NCCN (National Comprehensive Cancer Network) guidelines for genetic testing of cancer, in which germline mutations can be a relevant factor for BC susceptibility [20]; 3) METBC driv…
gene	TSO_list	NCCN_guidelines_list	METBC_drivers_list	WHO_list	Swedish_list
ABCA2					True
ABCA3					True
ABCB10					True
ABCB8					True
ABCG2					True
ABL1	True
ABL2	True				True
ABO				True
ABP1					True
ACADM					True
ACAN					True
ACAP1					True
ACCS					True
ACO2					True
ACVR1	True
ACVR1B	True				True
ADAM12					True
ADAM29				True
ADAMTSL3					True
ADCY3				True	True
ADNP					True
ADNP2					True
ADRA1A					True
ADSSL1				True
AGAP2					True
AGRN			True
AGTR1					True
AGTR2			True		True
AHCYL1					True
AHCYL2					True
AHRR				True
AIM1					True
AKAP6					True
AKAP9				True	True
AKT1	True		True		True
AKT2	True		True
AKT3	True
ALK	True				True
ALMS1					True
ALOX12B	True
ALS2CL					True
ALS2CR12				True
ALX1					True
ALX3					True
AMFR				True	True
AMPD2					True
ANKRD11	True
ANKRD16				True
ANKRD26	True
APC	True		True		True
APC2					True
APEX1					True
APOBEC3A				True
APOBEC3B				True
AR	True				True
ARAF	True
ARAP3					True
ARFGEF2					True
ARFIP1					True
ARFRP1	True
ARHGAP25					True
ARHGAP35					True
ARHGEF12					True
ARHGEF4					True
ARHGEF6				True
ARID1A	True		True		True
ARID1B	True		True
ARID2	True
ARID5B	True		True
ARIH1					True
ARPC4					True
ARRB1					True
ARRDC3				True
ASL					True
ASTN2				True
ASXL1	True		True
ASXL2	True				True
ATAD5				True
ATG10				True
ATM	True	True	True		True
ATN1					True
ATP5H					True
ATP8B1					True
ATP8B4					True
ATR	True		True		True
ATRX	True		True
ATXN1				True
ATXN7				True
AURKA	True
AURKB	True
AVEN					True
AXIN1	True		True		True
AXIN2	True
AXL	True
B2M	True
BAI2					True
BAP1	True		True
BARD1	True	True			True
BBC3	True
BCL10	True
BCL11A					True
BCL2	True
BCL2L1	True
BCL2L11	True			True
BCL2L2	True
BCL6	True
BCOR	True		True
BCORL1	True
BCR	True
BGN					True
BIRC3	True
BLM	True
BMPR1A	True
BMPR2					True
BNC1					True
BRAF	True		True		True
BRCA1	True	True	True		True
BRCA2	True	True	True	True	True
BRD4	True
BRIP1	True	True			True
BSN					True
BTG1	True
BTK	True
BUB1					True
BUB1B			True
C11orf10					True
C11orf30	True
C14orf1					True
C1ORF64					True
C5orf4					True
C5orf42					True
CACNA1F					True
CACNA1H					True
CALR	True
CALU					True
CARD11	True
CASC5					True
CASP8	True		True	True	True
CATSPERB					True
CBFB	True		True		True
CBL	True
CBLB			True
CCDC18					True
CCDC73					True
CCDC85A					True
CCDC88C				True
CCND1	True		True	True	True
CCND2	True
CCND3	True		True
CCNE1	True		True
CCNY					True
CD274	True
CD276	True
CD74	True
CD79A	True
CD79B	True
CDC123					True
CDC20					True
CDC73	True
CDCA7				True
CDCA7L				True
CDH1	True	True	True		True
CDH10					True
CDH11					True
CDH20					True
CDK12	True				True
CDK15					True
CDK4	True
CDK5					True
CDK5R1					True
CDK6	True		True
CDK8	True
CDKAL1				True
CDKN1A	True				True
CDKN1B	True		True
CDKN2A	True		True	True	True
CDKN2B	True		True	True
CDKN2C	True
CDYL2				True
CEBPA	True
CELSR1					True
CENPA	True
CENPE					True
CENPJ					True
CEP152					True
CEP68					True
CFP					True
CHD1					True
CHD2	True
CHD23					True
CHD4	True
CHD5					True
CHEK1	True
CHEK2	True	True	True	True	True
CHGB					True
CHRAC1					True
CHRNA9					True
CHST7					True
CHST9				True
CIC	True		True		True
CLCN3					True
CLTC					True
CMSS1				True
CNGA2					True
CNGB1					True
CNNM4					True
CNOT3			True
CNTN3					True
CNTN6					True
CNTNAP1				True	True
COL11A1					True
COL18A1					True
COL19A1					True
COL7A1					True
COX7B2					True
CPA3					True
CPAMD8					True
CPB1					True
CPB2					True
CPSF3					True
CREB5				True
CREBBP	True		True		True
CRKL	True
CRLF2	True
CRMP1					True
CROCC					True
CSF1					True
CSF1R	True				True
CSF3R	True
CSMD1					True
CSNK1A1	True
CSNK1D					True
CSPP1					True
CTCF	True		True
CTIF					True
CTLA4	True				True
CTNNA1	True		True		True
CTNNB1	True				True
CTNND1					True
CUBN					True
CUL3	True
CUX1	True		True	True
CXCR4	True
CYB5R4					True
CYLD	True
CYP1A1					True
CYP2C19					True
CYP2D6					True
DAXX	True
DBN1					True
DCAF6					True
DCLRE1B				True
DCUN1D1	True
DCUN1D3					True
DDR2	True
DDX10					True
DDX11					True
DDX41	True
DESI2					True
DHDDS					True
DHX15	True
DICER1	True
DIP2C					True
DIRAS3					True
DIRC3				True
DIS3	True
DKFZP686K1684					True
DLG5					True
DLL4					True
DLX2-AS1				True
DLX2-DT				True
DMD					True
DNAH11				True
DNAH17					True
DNAH3					True
DNAH9					True
DNAJB1	True
DNAJC1				True
DNAJC24					True
DNASE1L3					True
DNMT1	True
DNMT3A	True		True
DNMT3B	True
DOT1L	True
DPAGT1					True
DPEP3					True
DPM1					True
DPP10					True
DPY30					True
DPYD					True
DR1					True
DUSP1					True
DYNC2H1					True
DYSF					True
E2F3	True
EBAG9					True
EBF1				True
ECT2					True
ECT2L			True
EDC4			True
EED	True
EEF1G					True
EFHC2					True
EFNB1					True
EFTUD1					True
EGFL6					True
EGFL7	True
EGFR	True		True		True
EGOT				True
EHMT1					True
EIF1AX	True
EIF3E					True
EIF3M					True
EIF4A2	True
EIF4E	True
ELL				True
ELP4					True
EMBP1				True
EMID1				True
EML4	True
EP300	True				True
EP400					True
EPCAM	True	True
EPG5					True
EPHA10					True
EPHA3	True
EPHA5	True
EPHA7	True
EPHA8					True
EPHB1	True				True
EPS8L3					True
ERBB2	True		True		True
ERBB3	True		True		True
ERBB4	True				True
ERCC1	True
ERCC2	True
ERCC3	True	True			True
ERCC4	True		True
ERCC5	True
ERG	True
ERRFI1	True
ESR1	True		True	True	True
ESR2					True
ESRRG				True
ETS1	True
ETV1	True
ETV4	True
ETV5	True
ETV6	True				True
EWSR1	True
EXO1				True
EXOC2					True
EXOC3L1					True
EXOC6B					True
EXOSC3					True
EZH2	True
FAM107B					True
FAM123B	True
FAM171B					True
FAM175A	True
FAM210A					True
FAM40A					True
FAM46C	True
FANCA	True				True
FANCC	True
FANCD2	True
FANCE	True
FANCF	True
FANCG	True
FANCI	True
FANCL	True
FANCM					True
FAS	True
FAT1	True
FBXO32					True
FBXO41					True
FBXW7	True		True		True
FCRL5					True
FGF1	True
FGF10	True			True
FGF14	True
FGF19	True
FGF2	True
FGF23	True
FGF3	True
FGF4	True
FGF5	True
FGF6	True
FGF7	True
FGF8	True
FGF9	True
FGFR1	True				True
FGFR2	True		True	True	True
FGFR3	True				True
FGFR4	True
FH	True
FHOD3					True
FILIP1L				True
FLACC1				True
FLCN	True
FLI1	True
FLJ25328					True
FLJ43663				True
FLNA					True
FLNB					True
FLNC					True
FLT1	True
FLT3	True
FLT4	True
FMN1					True
FN1					True
FOXA1	True		True
FOXI1					True
FOXL2	True
FOXO1	True
FOXO3			True
FOXP1	True		True	True
FOXQ1				True
FRAS1			True
FREM1					True
FRS2	True				True
FSCB					True
FSIP2			True
FTO				True
FUBP1	True
FURIN					True
FYN	True
G3BP2					True
GAB1					True
GABRA6	True
GALNT5					True
GALNTL6					True
GAREM1				True
GATA1	True
GATA2	True
GATA3	True		True		True
GATA4	True
GATA6	True
GATAD2A				True
GEN1	True				True
GGA1					True
GID4	True
GIPR				True
GLI1	True				True
GNA11	True
GNA13	True
GNAQ	True				True
GNAS	True		True
GOLGB1					True
GOLIM4					True
GPNMB					True
GPR124	True
GPR84					True
GPS2	True		True
GREM1	True				True
GRHL1				True
GRIN2A	True
GRIN2D					True
GRM1					True
GRM3	True
GSK3B	True
GSN					True
GSTM1					True
GSTM2					True
GSTM2P1					True
GSTM3					True
GSTM4					True
GSTM5					True
GTF3C3					True
GTSF1					True
GUCY1A2					True
GUCY1A3					True
GUK1					True
H3F3A	True
H3F3B	True
H3F3C	True
HAP1					True
HAS1					True
HAS2					True
HAUS3					True
HCAR1					True
HDAC1					True
HDAC3					True
HDAC4					True
HDLBP					True
HECTD1					True
HECW1					True
HELQ				True
HERC1					True
HGF	True
HIAT1					True
HIC1					True
HIST1H1C	True
HIST1H2BD	True
HIST1H3A	True
HIST1H3B	True
HIST1H3C	True
HIST1H3D	True
HIST1H3E	True
HIST1H3F	True
HIST1H3G	True
HIST1H3H	True
HIST1H3I	True
HIST1H3J	True
HIST2H3A	True
HIST2H3C	True
HIST2H3D	True
HIST3H3	True
HIVEP3				True
HLA-A	True
HLA-B	True
HLA-C	True
HNF1A	True				True
HNF4G				True
HNRNPA1					True
HNRNPK	True
HOXA3					True
HOXB13	True
HRAS	True		True		True
HSD3B1	True
HSP90AA1	True
HSPA4				True
HSPG2					True
HUWE1					True
HYAL1					True
HYAL2					True
HYAL3					True
HYAL4					True
HYALP1					True
ICAM5					True
ICOSLG	True
ID3	True
IDH1	True
IDH2	True
IFNGR1	True
IGF1	True
IGF1R	True		True
IGF2	True
IGFBP5				True
IGFN1			True
IKBKE	True
IKZF1	True
IL10	True
IL1B					True
IL6R					True
IL7R	True
IL8					True
INHA	True
INHBA	True
INHBE					True
INPP4A	True
INPP4B	True
INSR	True
IPO7					True
IRAK2					True
IRAK3					True
IRAK4					True
IRF2	True
IRF4	True
IRF8					True
IRS1	True
IRS2	True
ITCH					True
ITGA1					True
ITGA6					True
ITGA9					True
ITPR1				True	True
ITPR3					True
JAG2					True
JAK1	True				True
JAK2	True				True
JAK3	True				True
JMJD1C					True
JUN	True
JUP					True
KANSL1				True
KAT5					True
KAT6A	True
KAT6B					True
KCNC1					True
KCNC2					True
KCNC3					True
KCNC4					True
KCNG4					True
KCNIP3					True
KCNN4				True
KDM5A	True
KDM5B					True
KDM5C	True
KDM6A	True		True		True
KDR	True
KEAP1	True				True
KEL	True
KIAA0664					True
KIAA1377					True
KIAA1468					True
KIAA1967					True
KIF14					True
KIF1C					True
KIF5B	True
KIT	True				True
KLF4	True
KLHDC7A				True
KLHL6	True
KMT2B	True
KMT2C	True		True		True
KMT2D	True		True
KPNA5					True
KRAS	True		True		True
KRT72					True
KRTAP2-1					True
KTN1					True
L3MBTL3				True
LAMA1					True
LAMA4					True
LAMB4					True
LAMP1	True
LATS1	True				True
LATS2	True
LDHA					True
LDHB					True
LEPREL1					True
LGR6				True
LHCGR					True
LINC-PINT				True
LINC00536				True
LMO1	True
LMX1B				True
LOC101929626				True
LOC105369192				True
LOC691083					True
LPHN2					True
LPP					True
LRBA					True
LRP1					True
LRP1B	True
LRRC7					True
LRRFIP1					True
LRRIQ1					True
LSAMP					True
LSAMP-AS3					True
LSP1				True	True
LUC7L2					True
LYN	True
LYPD5				True
LYST					True
LZTR1	True
MACF1					True
MAD2L1					True
MAG					True
MAGEE1					True
MAGEH1					True
MAGI2	True
MALT1	True
MAMDC4					True
MAN1A1					True
MAP1A					True
MAP2K1	True
MAP2K2	True
MAP2K4	True		True		True
MAP3K1	True		True	True	True
MAP3K11					True
MAP3K13	True
MAP3K14	True				True
MAP3K4	True
MAP3K6					True
MAP3K8					True
MAP7D1					True
MAPK1	True
MAPK3	True
MAPK8					True
MAPK8IP3					True
MAPKBP1					True
MAX	True
MC3R					True
MCL1	True
MCM8				True
MCTP2					True
MDC1	True
MDM2	True		True
MDM4	True			True
MED12	True
MED23			True
MEF2B	True
MEF2C					True
MEN1	True		True
MET	True				True
MFSD9					True
MGA	True
MGARP					True
MGAT4C					True
MICAL1					True
MIR1297					True
MIR640				True
MIS12					True
MITF	True
MKL1				True
MLH1	True	True	True		True
MLL	True
MLL2			True
MLL3			True		True
MLLT3	True
MLLT4			True
MLLT6					True
MORC1					True
MPL	True
MRE11A	True				True
MRPS30				True
MRTFA				True
MSH2	True	True	True
MSH3	True
MSH6	True	True			True
MST1	True
MST1R	True
MTMR3					True
MTMR8					True
MTOR	True				True
MUC16					True
MUC17					True
MUTYH	True
MYB	True				True
MYC	True		True	True	True
MYCBP2					True
MYCL1	True
MYCN	True
MYD88	True
MYH1					True
MYH11					True
MYH8					True
MYH9					True
MYLK4					True
MYO18B					True
MYO1G					True
MYOD1	True				True
NAB2	True
NALCN					True
NBN	True	True			True
NCKAP1L					True
NCOA1					True
NCOA2					True
NCOA3	True
NCOA6					True
NCOR1	True		True
NEB					True
NEDD1					True
NEFL					True
NEGR1	True
NEK2					True
NF1	True	True	True		True
NF2	True		True		True
NFE2L2	True
NFIB					True
NFIX				True
NFKBIA	True
NFKBIE					True
NID2					True
NIN					True
NINL					True
NKX2-1	True
NKX3-1	True
NLE1					True
NLRP8					True
NME9					True
NOBOX				True
NOP9					True
NOTCH1	True		True		True
NOTCH2	True		True
NOTCH3	True
NOTCH4	True				True
NPM1	True
NRAS	True		True		True
NRCAM					True
NREP				True
NRG1	True				True
NRG2					True
NRIP1				True
NRK					True
NSD1	True
NTM					True
NTN4				True
NTRK1	True
NTRK2	True
NTRK3	True
NTS					True
NUP133					True
NUP153					True
NUP214					True
NUP93	True
NUP98					True
NUTM1	True
OBSCN					True
ODZ1					True
OR2M4					True
OR4Q3					True
ORC4					True
OSBPL3			True
OTOF					True
OTUD7B				True
P4HA1					True
PAFAH1B1					True
PAGE1					True
PAK1	True
PAK3	True
PAK7	True
PALB2	True	True	True		True
PALLD					True
PAPD4					True
PAQR7					True
PARD3					True
PARD6G					True
PARK2	True
PARP1	True				True
PARP14					True
PARVA					True
PAX3	True
PAX5	True
PAX6					True
PAX7	True
PAX8	True
PAX9				True
PBRM1	True		True		True
PCDH19					True
PCDHB10					True
PCDHB15					True
PCM1					True
PCNT					True
PDCD1	True
PDCD11					True
PDCD1LG2	True
PDE4D				True
PDGFRA	True		True
PDGFRB	True				True
PDK1	True				True
PDK4					True
PDPK1	True
PER1					True
PEX14				True
PFDN5					True
PGR	True
PHF6	True		True
PHLDA3				True
PHOX2B	True
PID1					True
PIDD1				True
PIIK3CG	True
PIK3C2A					True
PIK3C2B	True				True
PIK3C2G	True				True
PIK3C3	True
PIK3CA	True		True		True
PIK3CB	True				True
PIK3CD	True
PIK3CG					True
PIK3R1	True		True		True
PIK3R2	True
PIK3R3	True			True
PIK3R4					True
PIK3R5					True
PIM1	True
PKDREJ					True
PKHD1					True
PLA2G6				True
PLCB1					True
PLCB2					True
PLCG1					True
PLCG2	True
PLD2					True
PLEKHA8					True
PLK2	True
PMAIP1	True
PMS1	True
PMS2	True	True	True
PNPLA8					True
PNRC1	True
PODXL					True
POLD1	True
POLE	True
POLQ					True
PP2R2A	True
PPARG	True
PPIL3					True
PPM1D	True
PPM1E					True
PPM1J					True
PPM1L					True
PPP2R1A	True				True
PPP6C	True
PRC1				True
PRDM1	True		True
PREX2	True		True
PRKAA2					True
PRKAR1A	True
PRKCI	True
PRKDC	True				True
PRKG2					True
PRPF4B					True
PRPS1					True
PRRC2A					True
PRSS8	True
PTCH1	True				True
PTCH2					True
PTEN	True	True	True		True
PTGES3					True
PTGFR					True
PTHLH					True
PTN					True
PTPN11	True
PTPN14					True
PTPRD	True				True
PTPRG					True
PTPRJ					True
PTPRS	True
PTPRT	True
PUM2					True
PURG					True
QKI	True
R3HCC1L					True
RAB35	True
RAB3C				True
RAC1	True				True
RAD21	True
RAD50	True				True
RAD51	True				True
RAD51B	True			True
RAD51C	True	True
RAD51D	True	True
RAD52	True
RAD54L	True
RAF1	True
RALY				True
RANBP2	True
RANBP9				True
RAP1GAP					True
RAPH1					True
RARA	True
RASA1	True				True
RASAL2					True
RASGRF2					True
RASSF9					True
RB1	True		True		True
RBM10	True
RBM47					True
RBM48					True
RBMX2					True
RCN1					True
RCN3					True
RECQL4	True				True
REL	True
RERE					True
RET	True				True
RFWD2	True
RFX2					True
RGL1					True
RGS20					True
RGS22					True
RHEB	True
RHOA	True		True
RHOG					True
RICTOR	True
RIMS2					True
RIN3				True
RIT1	True
RNASEH2A					True
RNF115				True
RNF213					True
RNF43	True
ROCK1					True
ROR1					True
ROS1	True				True
RP1L1					True
RPGRIP1					True
RPL23A					True
RPL23AP64					True
RPL32					True
RPS6KA4	True				True
RPS6KB1	True
RPS6KB2	True
RPTOR	True
RPUSD1					True
RRP9					True
RUNX1	True		True
RUNX1T1	True				True
RYBP	True
RYR1					True
RYR3					True
SATL1					True
SBNO1					True
SCARNA17					True
SCG5					True
SCN3A					True
SCNN1B					True
SDHA	True
SDHAF2	True
SDHB	True
SDHC	True
SDHD	True
SEMA5B					True
SENP2					True
SENP5					True
SENP6					True
SEPHS2					True
SERPINB1					True
SETBP1	True			True
SETD2	True		True
SF3B1	True		True		True
SFI1					True
SH2B3	True
SH2D1A	True
SH3RF1					True
SHE					True
SHQ1	True
SIK3					True
SIRT1					True
SIX4					True
SKA3					True
SLC22A9					True
SLC24A4					True
SLC35F5					True
SLC35G2					True
SLC44A1					True
SLC4A7				True
SLC6A15					True
SLC6A17					True
SLC6A3					True
SLC8A3					True
SLC9A2					True
SLC9C1					True
SLIT2	True
SLX4	True
SMAD2	True
SMAD3	True
SMAD4	True		True		True
SMARCA4	True		True		True
SMARCAL1					True
SMARCB1	True
SMARCD1	True
SMC1A	True
SMC3	True
SMC6					True
SMG1					True
SMO	True
SMPDL3A					True
SNCAIP	True
SNX4					True
SOCS1	True
SOGA3					True
SORL1					True
SOS1					True
SOS2					True
SOX10	True
SOX17	True
SOX2	True
SOX9	True
SP110					True
SPAG5					True
SPAG9					True
SPAM1					True
SPEN	True		True		True
SPOP	True
SPRR2B					True
SPTA1	True
SPTAN1					True
SPTBN1					True
SRC	True
SREBF2					True
SRSF2	True
ST13					True
STAG1	True
STAG2	True		True
STARD8					True
STARD9					True
STAT1					True
STAT3	True
STAT4	True				True
STAT5A	True
STAT5B	True
STK11	True	True	True		True
STK36					True
STK40	True
SUFU	True
SULF2					True
SUV39H1					True
SUZ12	True
SYK	True
SYNE2					True
SZT2					True
TAB2				True
TACC2					True
TADA2A					True
TAF1	True				True
TANC1					True
TANK					True
TBC1D4					True
TBL1XR1			True
TBX3	True		True	True
TCEB1	True
TCF12					True
TCF3	True				True
TCF7L2	True			True
TDRD6					True
TECTA					True
TEK					True
TERC	True
TERT	True			True
TET1	True				True
TET2	True		True	True
TEX14					True
TFAP2A				True
TFE3	True
TFRC	True
TG					True
TGFBI					True
TGFBR1	True
TGFBR2	True			True
THBS3					True
THOC5					True
TIAM1					True
TIMELESS					True
TLN1					True
TMEM127	True
TMPRSS2	True
TNFAIP3	True
TNFRSF14	True
TOP1	True
TOP2A	True
TOX3				True
TP53	True	True	True		True
TP63	True
TRAF2	True
TRAF7	True
TRIM46				True
TSC1	True
TSC2	True
TSHR	True
TTN					True
U2AF1	True
USP9X			True
VEGFA	True
VGLL3				True
VHL	True
VTCN1	True
WDR43				True
WISP3	True
WT1	True
XBP1			True
XIAP	True
XPO1	True
XRCC2	True
XRCC6				True
YAP1	True
YES1	True
ZBTB2	True
ZBTB38				True
ZBTB7A	True
ZC3H11A				True
ZFHX3	True
ZFP36L1			True
ZFPM2				True
ZMIZ1				True
ZNF217	True		True
ZNF365				True
ZNF703	True		True
ZRSR2	True
