# Supplementary figures and images for: Genomic Landscape of Normal and Breast Cancer Tissues in a Hungarian Pilot Cohort
Source: MDPI journal article supplement (doi:10.3390/ijms24108553), 2023-05-10

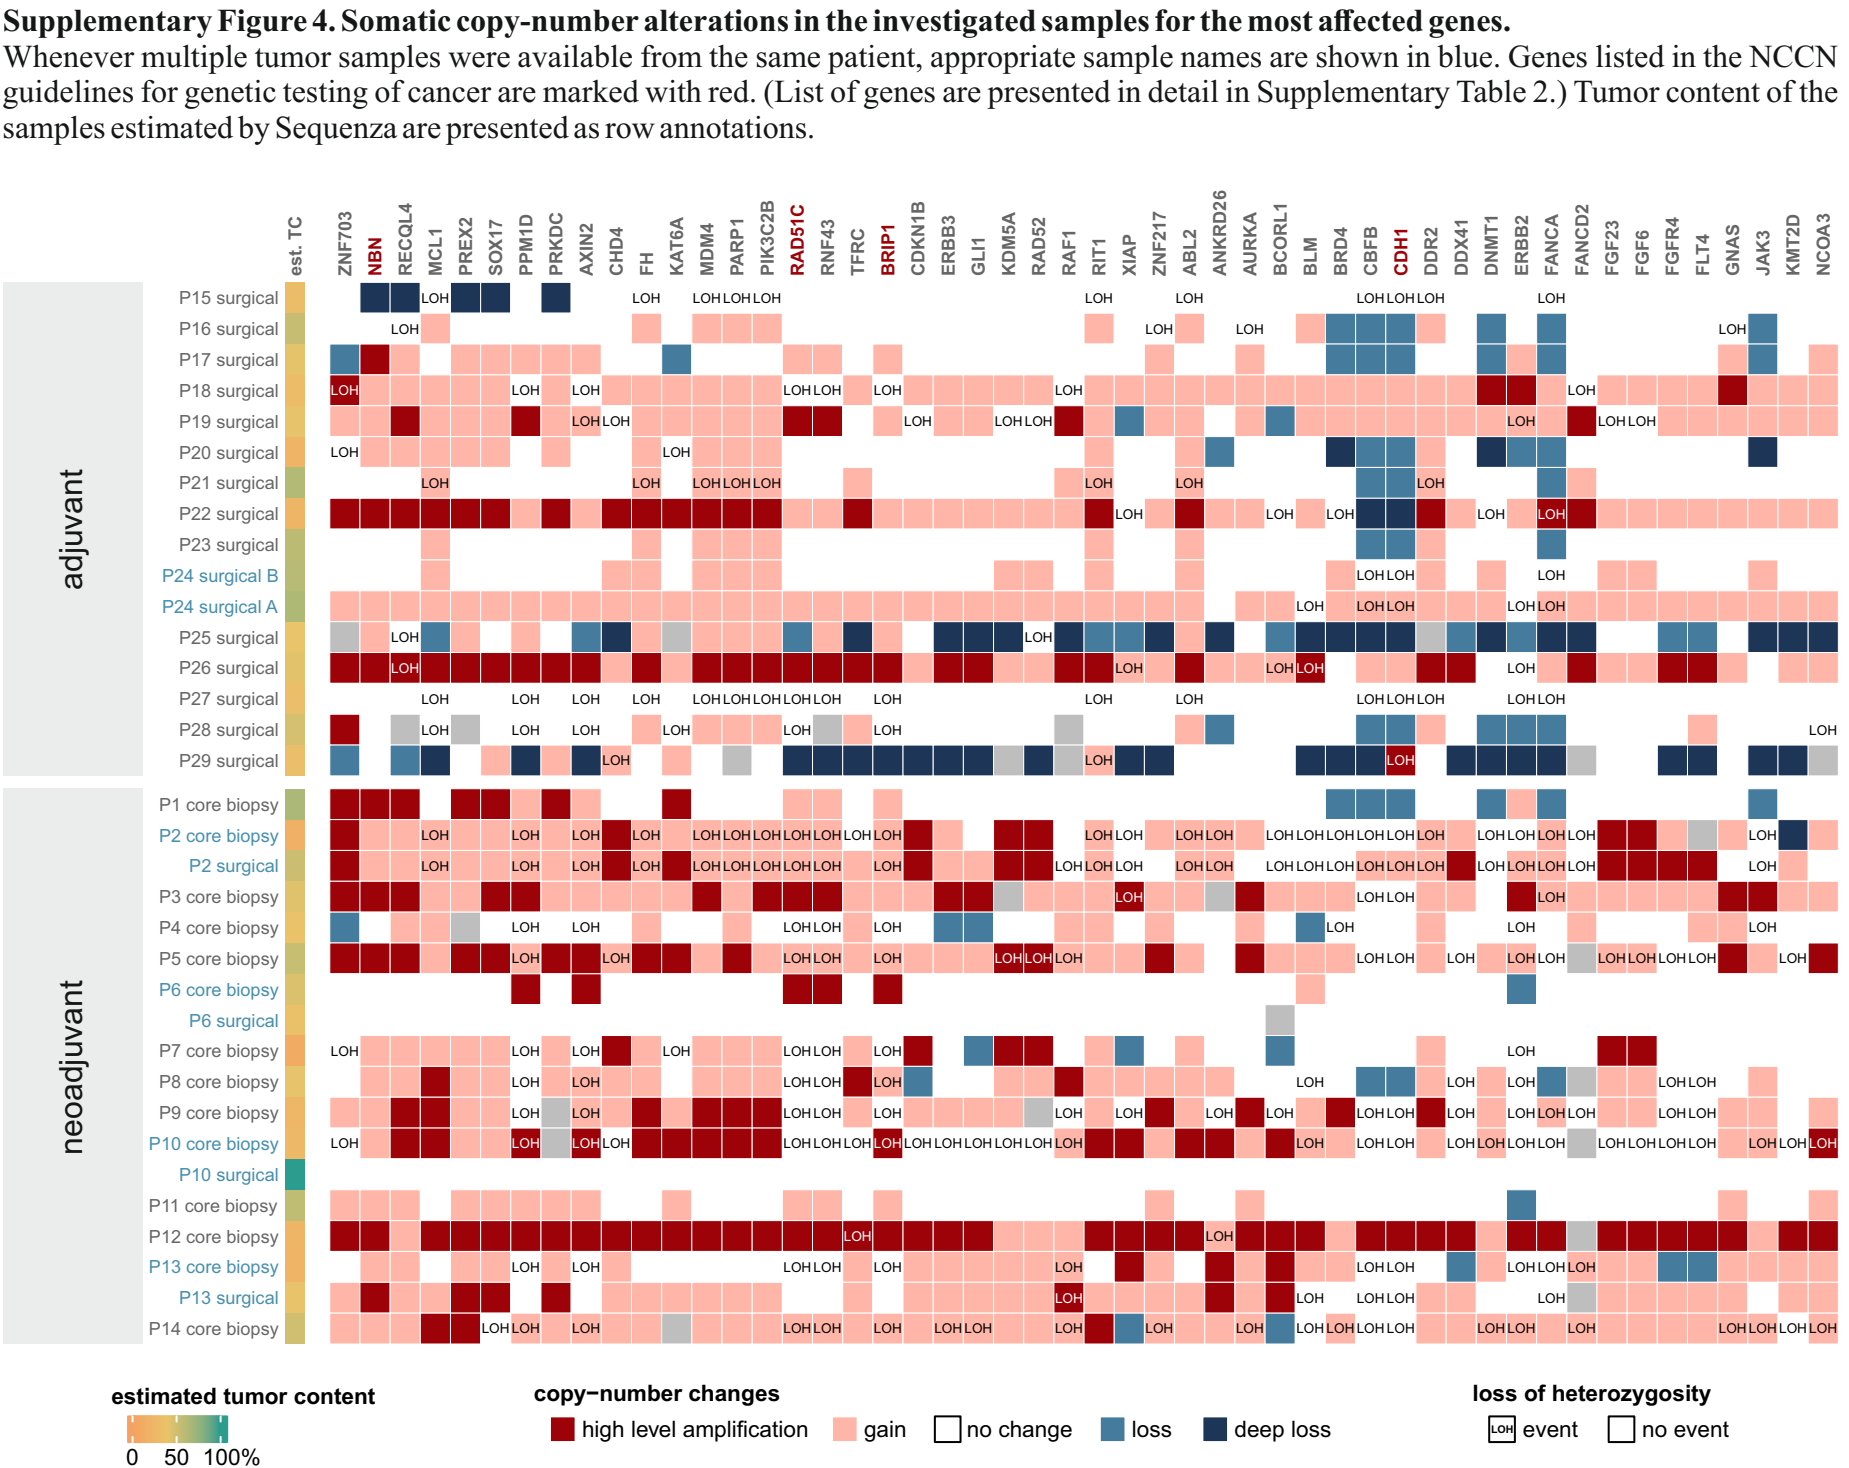

Supplement: s1 [file s1]
